Correction

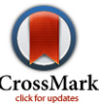

# Correction: Prevalence, Incidence and Determinants of Herpes Simplex Virus Type 2 Infection among HIV-Seronegative Women at High-Risk of HIV Infection: A Prospective Study in Beira, Mozambique

The *PLOS ONE* Staff

The following information is missing from the Funding section: AZ was partially supported by a Fogarty International Center AIDS International Training and Research Program grant, National Institutes of Health, to the University of Pittsburgh (D43TW001038).

## Reference

1. Meque I, Dubé K, Feldblum PJ, Clements ACA, Zango A, et al. (2014) Prevalence, Incidence and Determinants of Herpes Simplex Virus Type 2 Infection among HIV-Seronegative Women at High-Risk of HIV Infection: A Prospective Study in Beira, Mozambique. *PLoS ONE* 9(2): e89705. doi:10.1371/journal.pone.0089705

**Citation:** The *PLOS ONE* Staff (2014) Correction: Prevalence, Incidence and Determinants of Herpes Simplex Virus Type 2 Infection among HIV-Seronegative Women at High-Risk of HIV Infection: A Prospective Study in Beira, Mozambique. *PLoS ONE* 9(6): e100397. doi:10.1371/journal.pone.0100397

**Published:** June 13, 2014

**Copyright:** © 2014 The *PLOS ONE* Staff. This is an open-access article distributed under the terms of the Creative Commons Attribution License, which permits unrestricted use, distribution, and reproduction in any medium, provided the original author and source are credited.
